# Supplementary material for: MAEL contributes to gastric cancer progression by promoting ILKAP degradation
Source: PubMed Central journal article supplement (PMC5768331; doi:10.18632/oncotarget.22970), 2017-12-06
Supplement: oncotarget-08-113331-s001.pdf [file oncotarget-08-113331-s001.pdf]

## MAEL contributes to gastric cancer progression by promoting ILKAP degradation

### SUPPLEMENTARY MATERIALS

**Supplementary Table 1: Antibodies used in the study**

| Antibodies against                    | Catalog No     | Source                                |
|---------------------------------------|----------------|---------------------------------------|
| MAEL                                  | PA5-20923      | ThermoFisher, Rockford, IL, USA       |
| ILKAP                                 | HPA004752      | Sigma-Aldrich, St.Louis, MO, USA      |
| ILKAP                                 | H00080895-B01P | Novus Biologicals, Littleton, CO, USA |
| p38 MAPK                              | 8690           | CST, Danvers, MA, USA                 |
| phospho-p38 (T180/T182)               | 4511           | CST, Danvers, MA, USA                 |
| phospho-RSK2 (S227)                   | 3556           | CST, Danvers, MA, USA                 |
| phospho-Chk1(S345)                    | 2348           | CST, Danvers, MA, USA                 |
| Phospho-GSK-3 $\beta$ (S9)            | 5558           | CST, Danvers, MA, USA                 |
| Phospho-Akt (S473)                    | 4060           | CST, Danvers, MA, USA                 |
| E-cadherin                            | 3195           | CST, Danvers, MA, USA                 |
| N-cadherin                            | 13116          | CST, Danvers, MA, USA                 |
| $\beta$ -Actin                        | AT0001         | CMCTAG, Milwaukee, WI, USA            |
| GAPDH                                 | AT0002         | CMCTAG, Milwaukee, WI, USA            |
| Myc-tag                               | C3956          | Sigma-Aldrich, St.Louis, MO, USA      |
| HA-tag                                | SAB1305536     | Sigma-Aldrich, St.Louis, MO, USA      |
| HRP-labeled goat $\alpha$ -rabbit IgG | 074-1506       | KPL, Gaithersburg, MD, USA            |
| HRP-labeled goat $\alpha$ -mouse IgG  | 5220-0287      | KPL, Gaithersburg, MD, USA            |

**Supplementary Table 2: Chemicals used in the study**

| Chemicals             | Source                           |
|-----------------------|----------------------------------|
| hygromycin B          | BBI, Shanghai, China             |
| puromycin             | BBI, Shanghai, China             |
| Leupetin              | BBI, Shanghai, China             |
| Chloroquine           | BBI, Shanghai, China             |
| MG132                 | BBI, Shanghai, China             |
| 3-MA                  | BBI, Shanghai, China             |
| 5-aza-2-deoxycytidine | Sigma-Aldrich, St.Louis, MO, USA |
| MTT                   | BBI, Shanghai, China             |

**Supplementary Table 3: The clinicopathological parameters of the gastric cancer patients used in the study**

| Gender | Age | Pathology      | Differentiation | Diameter | TNM    | Stage |
|--------|-----|----------------|-----------------|----------|--------|-------|
| Male   | 86  | adenocarcinoma | poor            | 4 cm     | T3N1M1 | III   |
| Male   | 55  | adenocarcinoma | high            | 1 cm     | T1N0M0 | I     |
| Female | 48  | adenocarcinoma | poor            | 2.5 cm   | T3N0M0 | II    |
| Male   | 68  | adenocarcinoma | poor            | 4 cm     | T3N0M1 | II    |

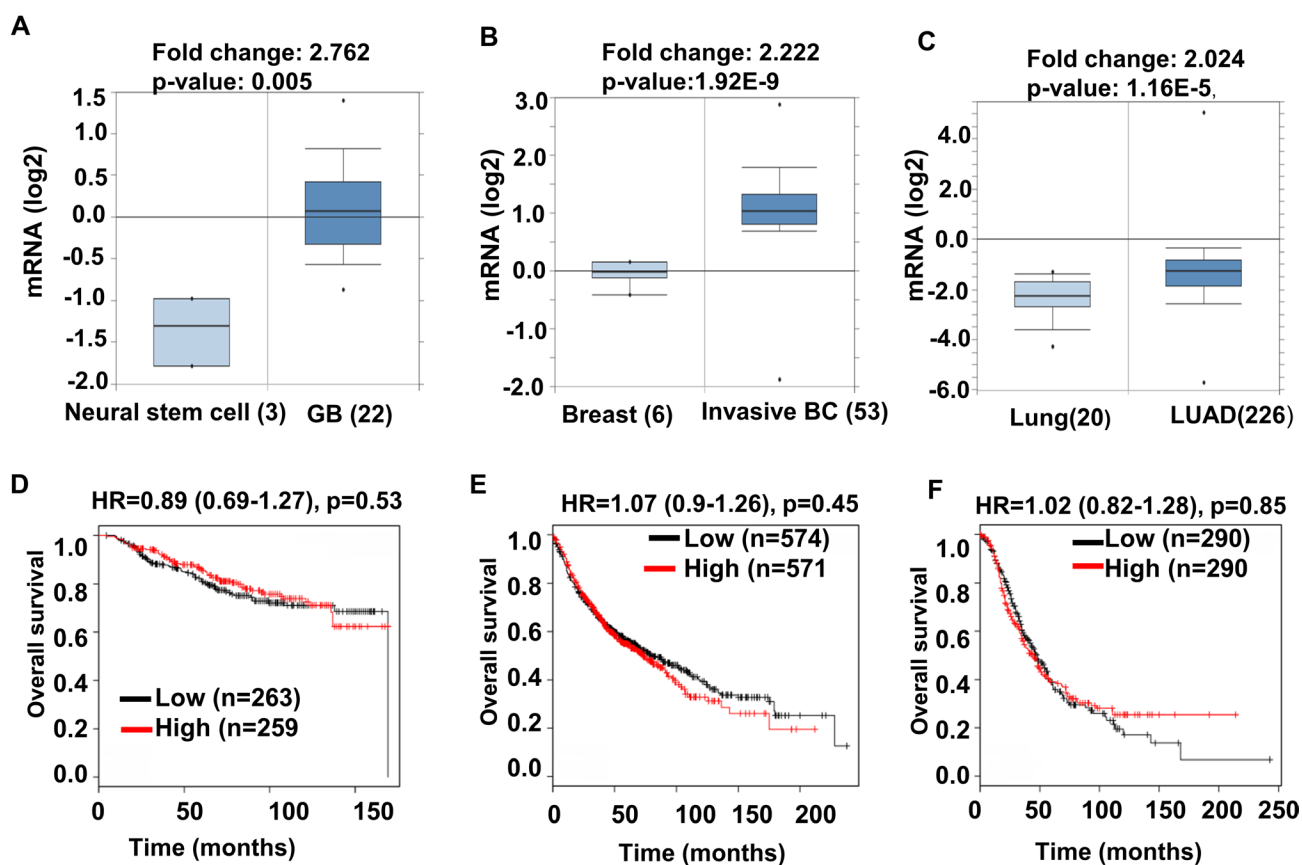

**Supplementary Figure 1: Expression and prognostic significance of *MAEL* gene.** (A–C) Differential expression of *MAEL* mRNA in normal and cancer tissues were analyzed using Oncomine based on the NCBI GEO datasets (glioblastoma: GSE4536, invasive breast cancer: GSE9014 and lung adenocarcinoma: GSE31210). GB: glioblastoma, BS: breast cancer, OS: overall survival, LUAD: lung adenocarcinoma. (D–F) The survival curves of patients with breast (D), lung (E) and ovarian (F) cancers were plotted using Kaplan Meier plotter, which includes 5,143 breast, 1,816 ovarian, 2,437 lung and 1,065 gastric cancer patients with a mean follow-up of 69/40/49/33 months.

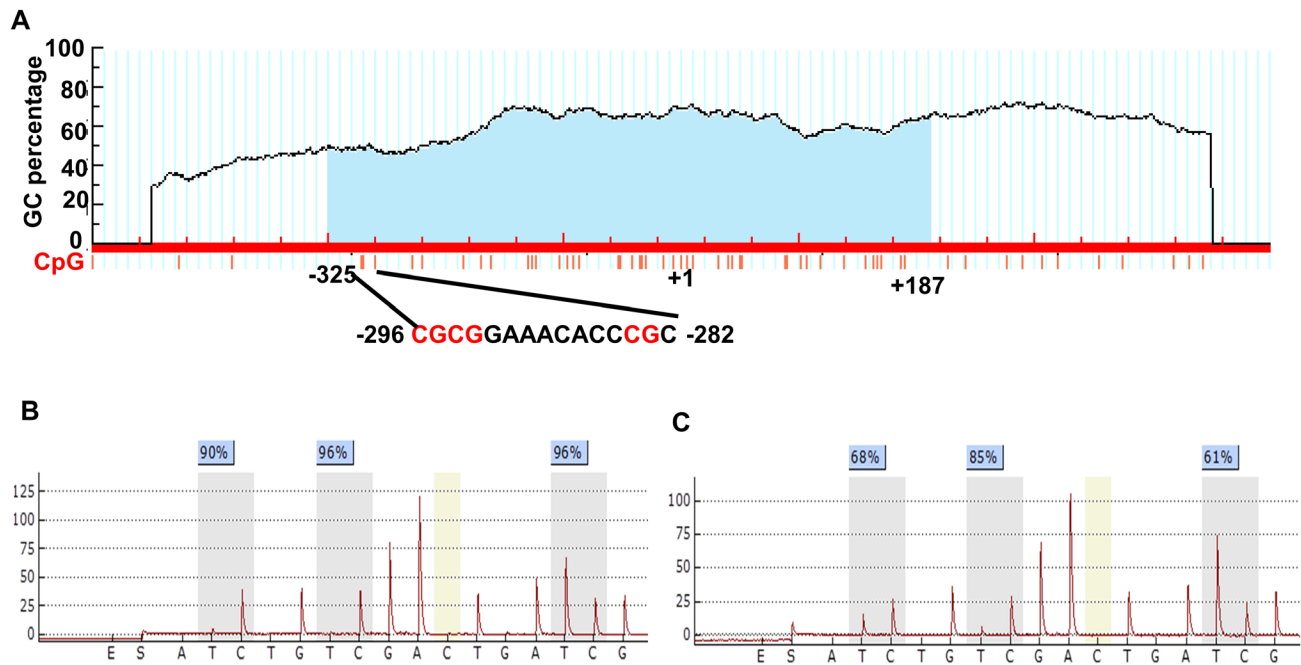

**Supplementary Figure 2: Methylation level of *MAEL* gene promoter was quantified by pyrosequencing.** (A) Schematic diagram of the *MAEL* gene promoter. The CpG island (blue) was predicted by MethPrimer software, which locates at nucleotides -293 to +178, relative to transcription start site (+1). The sequence to be detected by pyrosequencing is CGCGGAAACACCCGC, which includes 3 CpG dinucleotides. (B, C) The pyrograms of an adjacent normal gastric tissue (B) and a gastric tumor tissue (C). Grey areas indicate the CpG sites that were analyzed. The percentages (blue) are the proportion of C at each CpG site after bisulfite conversion. The yellow regions indicate controls regions for automatic assessment of bisulfite conversion (unmethylated C should be fully converted to T). An overall *MAEL* promoter methylation level is calculated as the average of the proportions of C (%) at the 3 CpG sites. The y-axis represents the signal intensity, the x-axis shows the dispensation sequence.

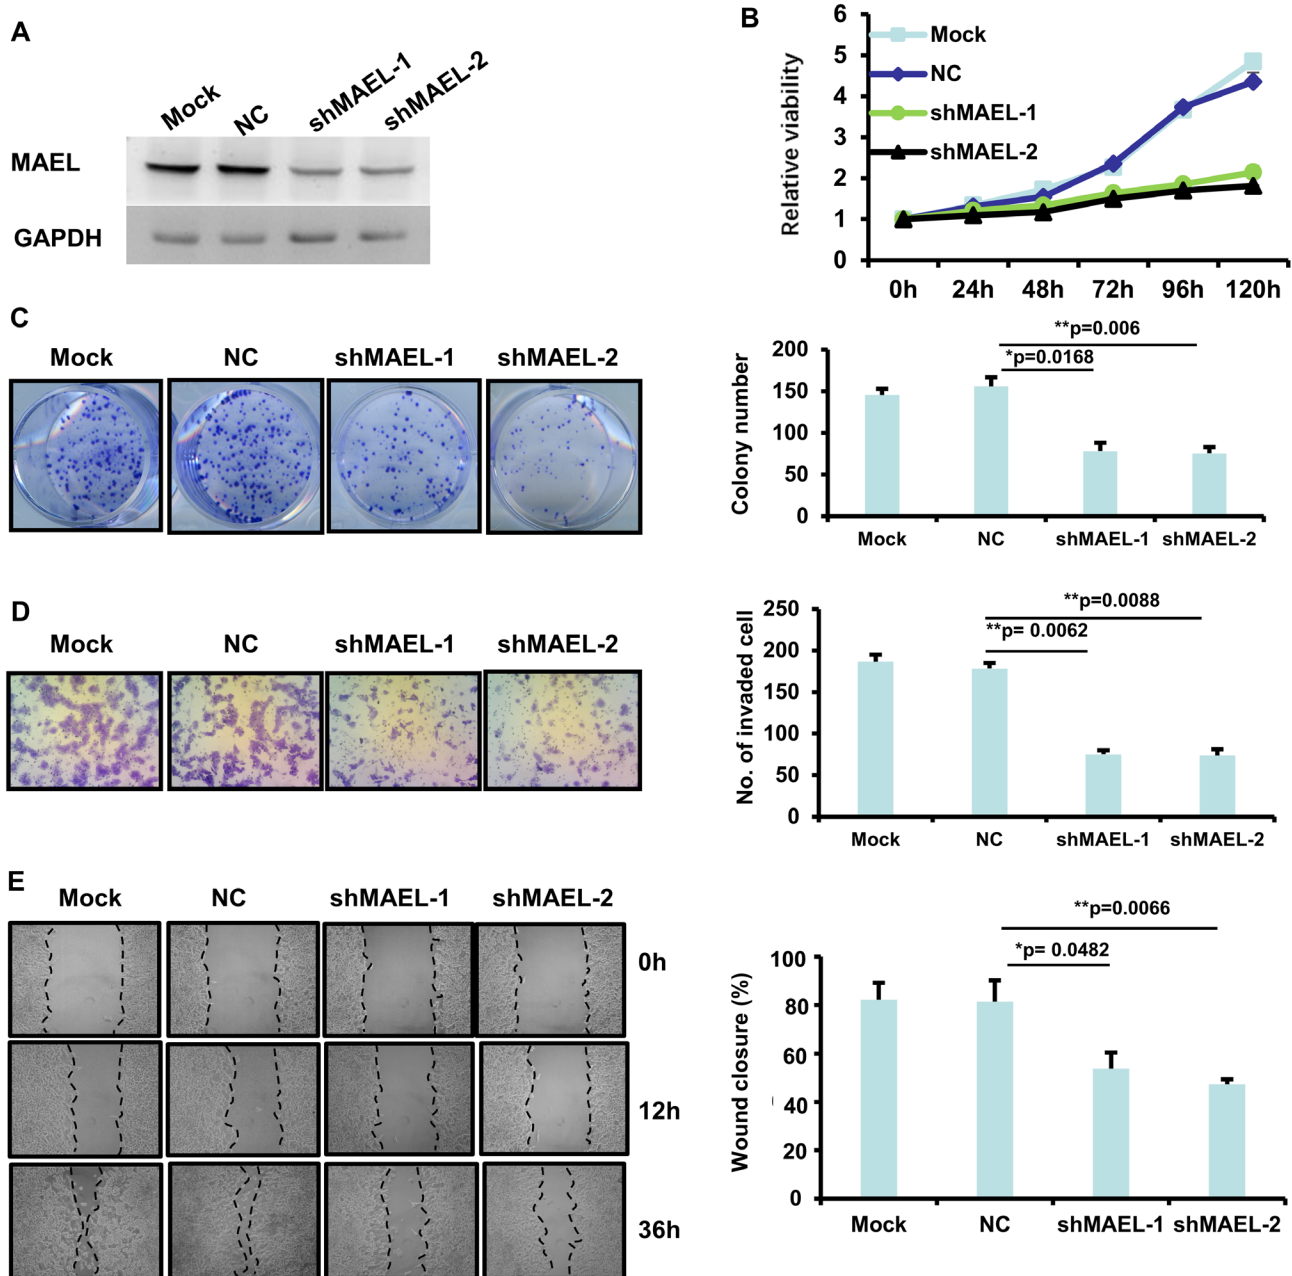

**Supplementary Figure 3: MAEL knockdown inhibits proliferation, migration and invasion in SUN-1 cells.** (A) MAEL protein levels in the untreated SUN-1 cells (mock) and the SUN-1 cells stably expressing MAEL shRNA (shRNA-1, shRNA-2) or scrambled shRNA (NC). (B) The cell growth was determined by MTT assay. (C) Representative images of colony (left panel) and the colony numbers (right panel). (D) Representative images (left panel) and statistical analysis (right panel) of invaded cells in the Transwell invasion assay. (E) Representative images of wound area (left panel) at the indicated time and percentage of wound closure (right panel) at 36 h after scratching. The target sequences of MAEL for constructing lentiviral shRNA were as follows: shRNA1: 5'-GGAAGTGGCCACCTATCTACT-3'; shRNA2: 5'-GAGTCAACTGGTGTGTTGAAGC-3'. All the values were presented as means  $\pm$  S.D for at least three independent *in vitro* experiments. Differences between two groups were analyzed by student *t*-test; \**p*-value  $\leq$  0.05 and \*\**p*-value  $\leq$  0.01.

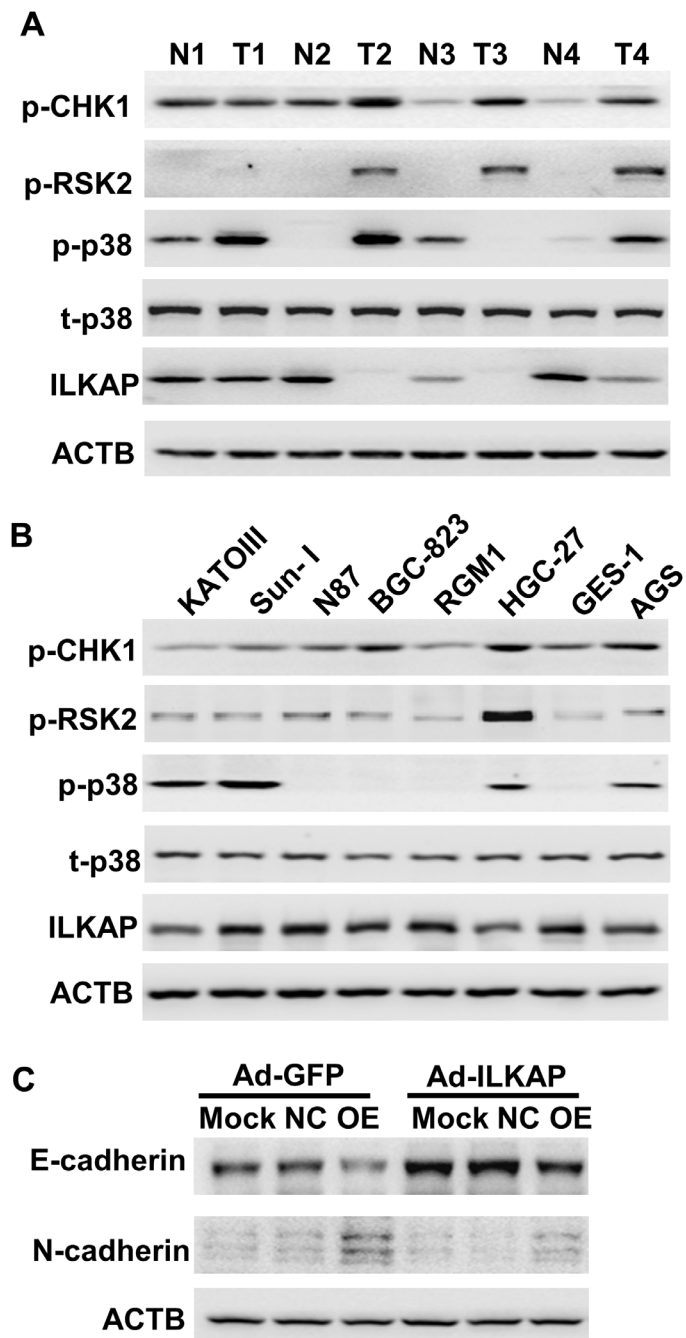

**Supplementary Figure 4: Western blot analysis.** (A) The expression of ILKAP and phosphorylated CHK1, RSK2, p38 in the 4 pairs of gastric tumor and adjacent normal tissues. (B) The expression of ILKAP protein and phosphorylated CHK1, RSK2, p38 in the gastric cell lines. (C) Effect of adenovirus-mediated ILKAP expression on the levels of E-cadherin and N-cadherin. The GES-1 cells (mock) and the GES-1 cells stably expressing empty vector (NC) or MAEL cDNA (OE) were infected with adenovirus expressing *GFP* or *ILKAP*. At 48 h after infection, the cells were harvested and subjected to Western blotting with indicated antibodies.

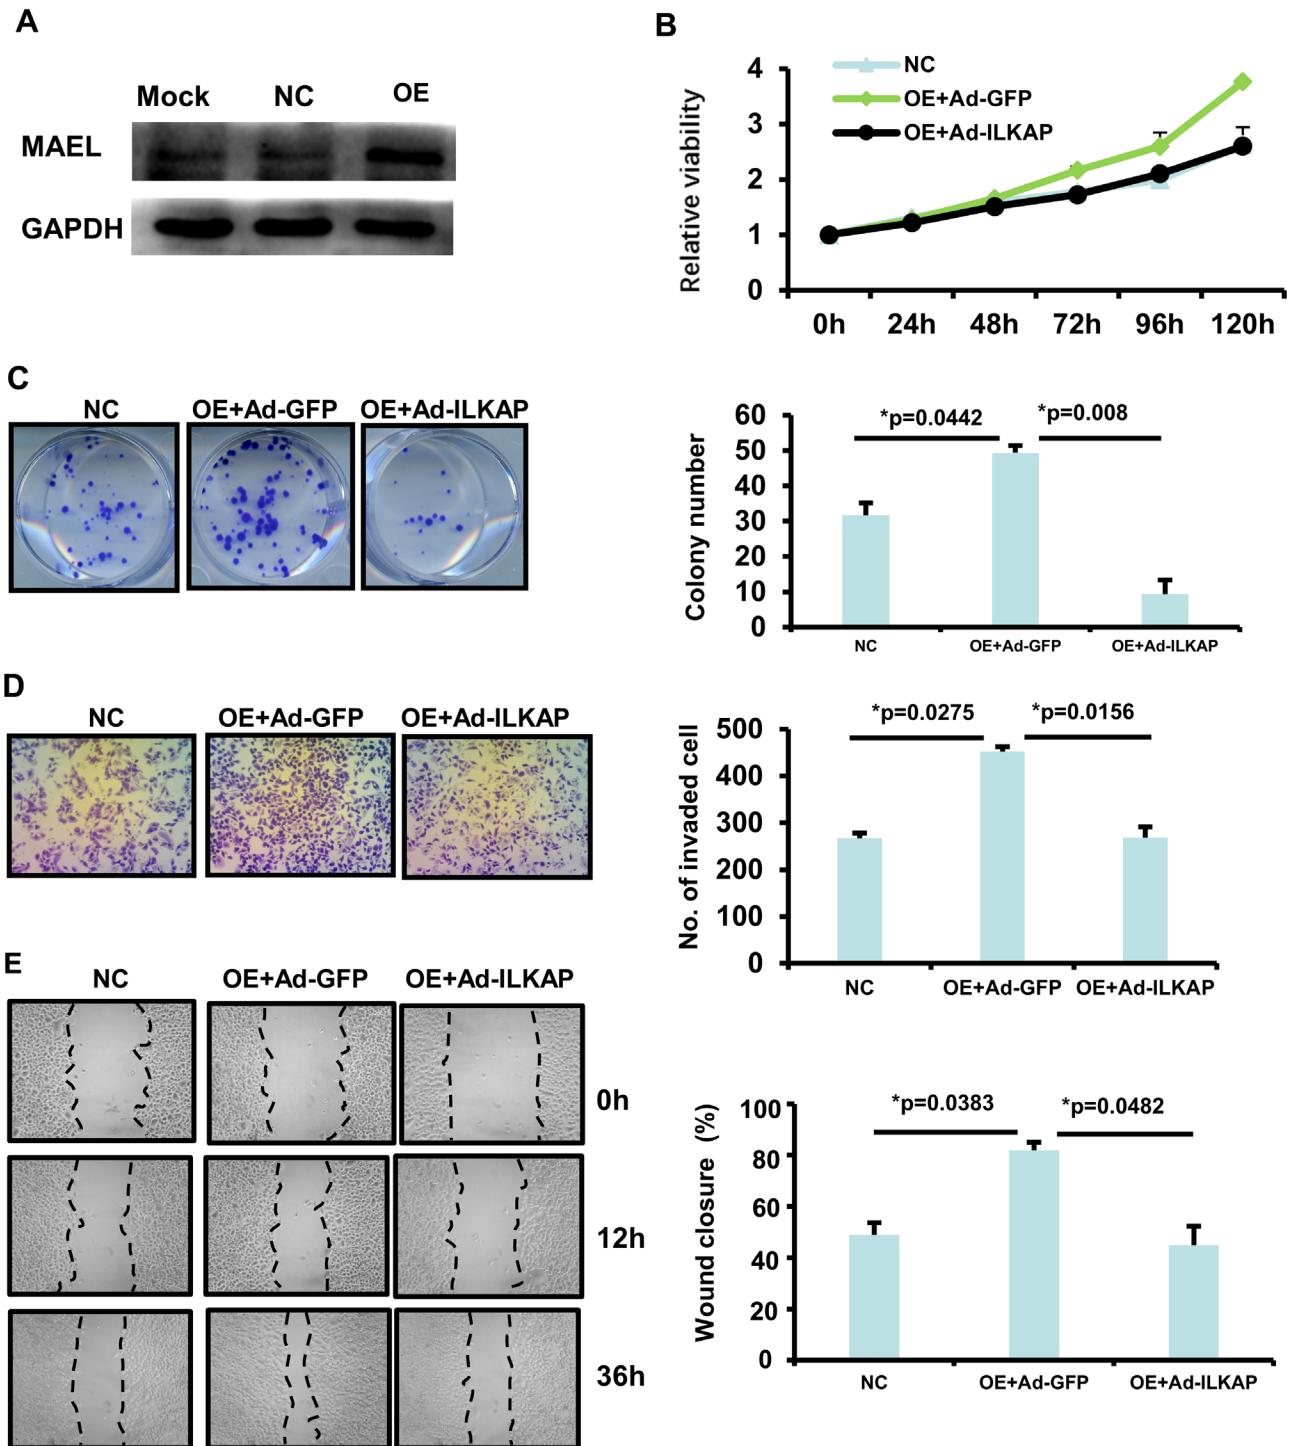

**Supplementary Figure 5: Adenovirus-mediated *ILKAP* overexpression suppresses the oncogenic roles of *MAEL*.** The BGC-823 cells stably expressing *MAEL* cDNA or empty vector were infected with adenovirus expressing GFP (Ad-GFP) or *ILKAP* (Ad-*ILKAP*). **(A)** The *MAEL* expression levels in BGC-823 cells (Mock) and the BGC-823 cells with stable expression empty vector (NC) or *MAEL* cDNA (OE) were detected by Western blotting. **(B)** Dynamic changes of cell viability determined by MTT assay. The cells were harvested for MTT assay at different time after adenovirus infection. **(C)** Representative images of colony (left panel) and the colony numbers (right panel). **(D)** Representative images (left panel) and statistical analysis (right panel) of invaded cells in the Transwell invasion assay. **(E)** Representative images (left panel) of wound area at the indicated time and percentage of wound closure at 36 h after scratching (right panel). All the values were presented as means  $\pm$  S.D for at least three independent *in vitro* experiments. Differences between two groups were analyzed by student *t*-test; \**p*-value  $\leq$  0.05 and \*\**p*-value  $\leq$  0.01.



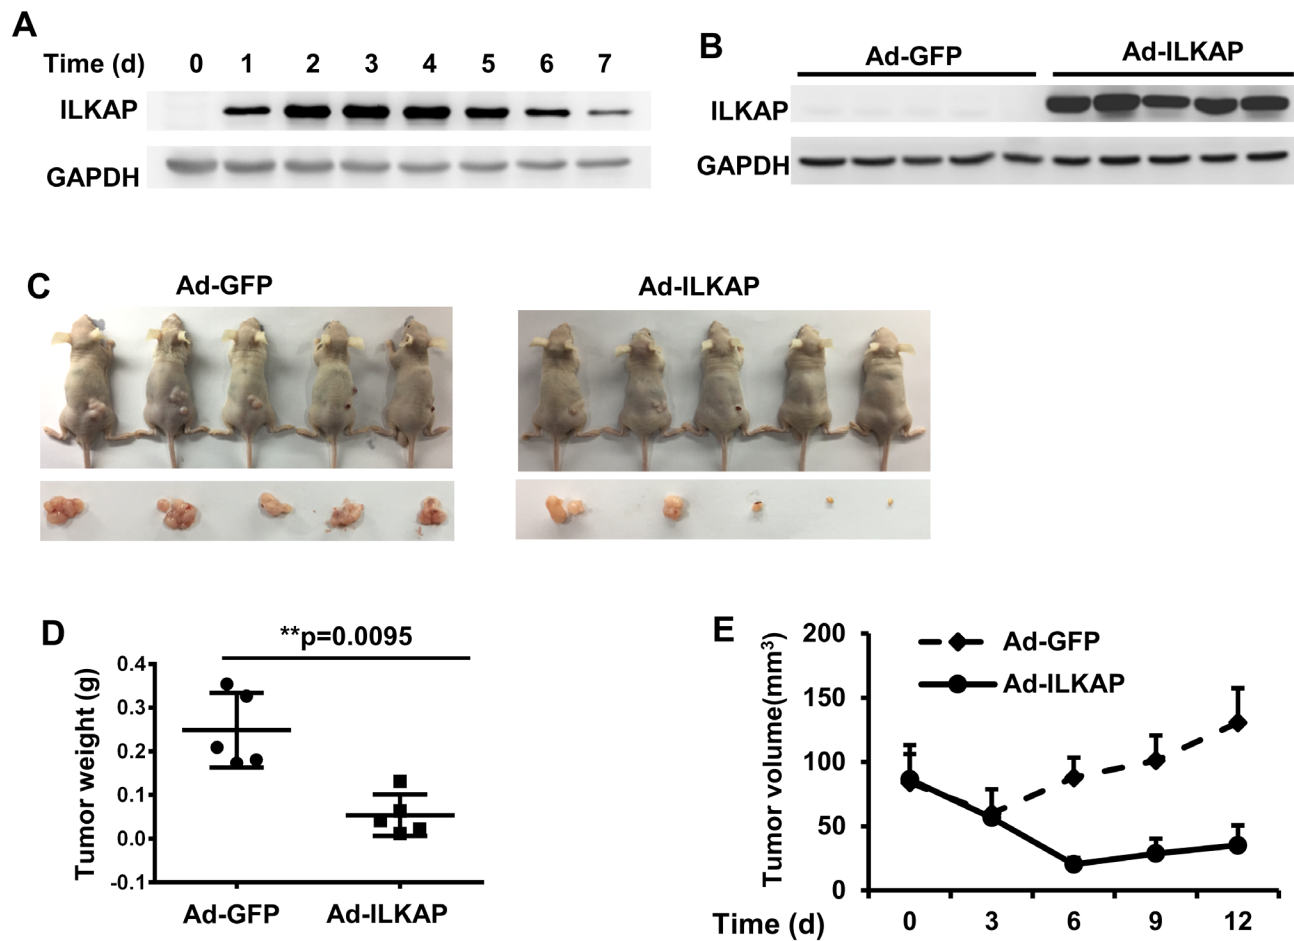

**Supplementary Figure 6: Therapeutic effects of adenoviruses expressing ILKAP on xenograft tumors.** (A) Dynamic changes of ILKAP protein levels in the HGC-27 cells after infection with adenoviruses expressing *ILKAP*. (B–D) The therapeutic effects of adenovirus-mediated ILKAP expression. BALB/c nude mice (7–8 weeks old) were injected with  $5 \times 10^6$  HGC-27 cells at the back of nude mice. When the tumor volume reached 50–100 mm<sup>3</sup>, the adenovirus expressing *ILKAP* or *GFP* were injected intratumorally at a dose of  $1 \times 10^9$  PFU (pore-forming unit) in 100  $\mu$ L of phosphate-buffered saline (PBS). Mice received a second injection at 2 days after the first injection. (B) Expression of ILKAP protein in the xenograft tumors injected with Ad-GFP or Ad-ILKAP at 48 h after injection. (C) Representative images of the xenograft tumors derived from HGC-27 cells at 15 days after adenovirus injection. (D) Weights of xenograft tumors at 15 days after adenovirus injection. (E) Dynamic volume of xenograft tumors at different time after adenovirus injection.

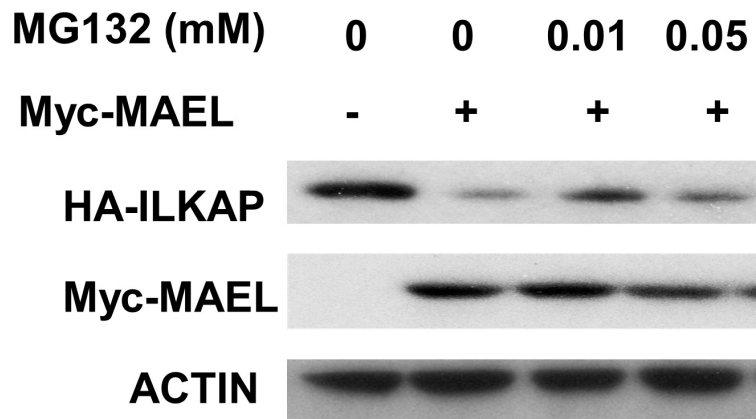

**Supplementary Figure 7: Treatment with MG132 has no significant effect on ILKAP levels.** The HEK293 cells were transfected with HA-ILKAP and Myc-MAEL plasmids and treated with CHX plus MG132 for 4 h, HA-ILKAP protein levels were detected by Western blotting.
